# Supplementary material
Source: PubMed Central journal article supplement (PMC2893983)

**Supplemental Table 1. Oligonucleotides used in this study**

| <b>QUANTITATIVE</b> | <b>RT-PCR</b> |                              |
|---------------------|---------------|------------------------------|
| BDNF                | FWD           | 5'-CCATGACCTGAAAGGAAACAG-3'  |
|                     | REV           | 5'-CACAATTAAGCAGCATGCAA-3'   |
| Pax7                | FWD           | 5'-GACGACGAGGAAGGAGACAA-3'   |
|                     | REV           | 5'-CGGGTTCTGATTCCACATCT-3'   |
| embMyHC             | FWD           | 5'-GCAGATTCAGAAACTGGAGAC-3'  |
|                     | REV           | 5'-CCTTAACACGCCGCTCATAAC-3'  |
| MyoD                | FWD           | 5'-TGGCATGATGGATTACAGCG -3'  |
|                     | REV           | 5'-CCACTATGCTGGACAGGCAGT-3'  |
| Myogenin            | FWD           | 5'-ATCGCGCTCCTCCTGGTTGA-3'   |
|                     | REV           | 5'-CTGGGGACCCCTGAGCATTG-3'   |
| 18S Ribosomal       | FWD           | 5'-CGCCGCTAGAGGTGAAATC-3'    |
|                     | REV           | 5'-CCAGTCGGCATCGTTTATGG-3'   |
| P21                 | FWD           | 5'-CTCTTCTGCTGTGGGTCAGG -3'  |
|                     | REV           | 5'-AAGTTTGGAGACTGGGAGAGG -3' |
| neoMyHC             | FWD           | 5'-TCGCTGGCTTTGAGATCTTT-3'   |
|                     | REV           | 5'-ACGAACATGTGGTGGTTGAA-3'   |
| GAPDH               | FWD           | 5'-GGGTGTGAACCACGAGAAAT-3'   |
|                     | REV           | 5'-CCTTCCACAATGCCAAAGTT-3'   |

  

| <b>ENDPOINT</b> | <b>RT-PCR</b> |                                      |
|-----------------|---------------|--------------------------------------|
| MyoD            | FWD           | 3'-GCCCGCGCTCCAAGTCTGAT-5'           |
|                 | REV           | 3'-CCTACGGTGGTGCGCCCTCTCGC-5'        |
| Myogenin        | FWD           | 3'-GGGCCCCTGGAAGAAAAG-5'             |
|                 | REV           | 3'-AGGAGGCGCTGTGGGAGT-5'             |
| MSTN            | FWD           | 3'-GACGATTATCACGCTACCACGGAAAC-5'     |
|                 | REV           | 3'-CATCGCAGTCAAGCCCAAAGTCTCTC-5'     |
| 28S             | FWD           | 3'-TTGTTGCCATGGTAATCCTGCTCAGTACG-5'  |
|                 | REV           | 3'-TCTGACTTAGAGGCGTTCAGTCATAATCCC-5' |

***Supplemental Figure 1. Expression levels of neurotrophins and their receptors are not altered in the absence of muscle-BDNF.*** A) Relative levels of BDNF, NGF, NT-3 and NT-4/5 transcript in EDL, TA, DIA muscles from adult BDNFMKO mice. B) Transcript levels of neurotrophin receptors p75<sup>NTR</sup>, TrkA, TrkB and TrkC in EDL, TA, DIA muscles from adult BDNF<sup>MKO</sup> mice. All values are relative to control (---) mRNA levels (n=6). Error bars represent SE.

***Supplemental Figure 2. Overall muscle histology is not affected in the BDNF<sup>-/-</sup> mouse at postnatal day 1.*** A) Representative haematoxylin and eosin stained cross-sections from control (CTL) and BDNF<sup>-/-</sup> (KO) hindlimb sections at postnatal day 1 (n=3) B) Quantification of the average cross-sectional area and C) fiber number from P1 cross-sections (n=3). Error bars represent SE.

***Supplemental Figure 3. Expression levels of genes involved in regulation of myogenic differentiation are not changed in the BDNF<sup>MKO</sup> mouse.*** Relative levels of MyoD, Myogenin, and Myostatin (MSTN) transcript in EDL, TA, DIA muscles from 6-8 week old BDNF<sup>MKO</sup>. All values are relative to control mRNA levels standardized to 28S ribosomal RNA (n=6) Error bars represent SE.

***Supplemental Figure 4. Decreased fusion of BDNF<sup>MKO</sup>-derived myotubes.*** Quantification of the number of nuclei per myotube in BDNFMKO (MKO) and control (CTL) cultures following 5 days in differentiation promoting medium (n=4).

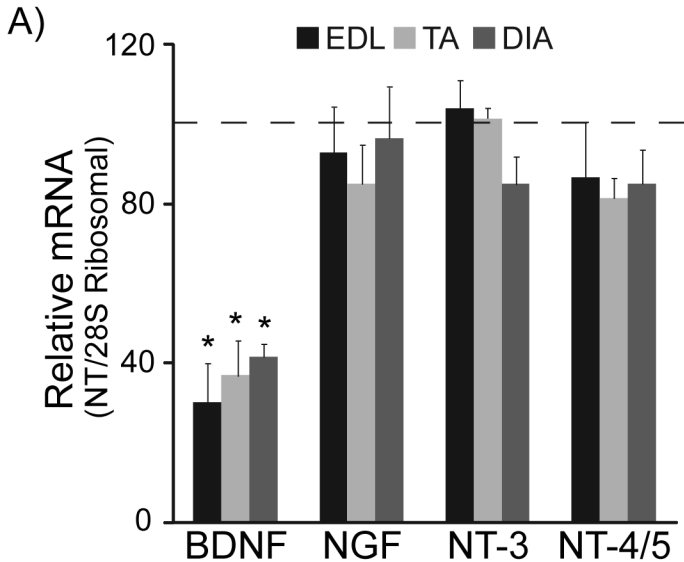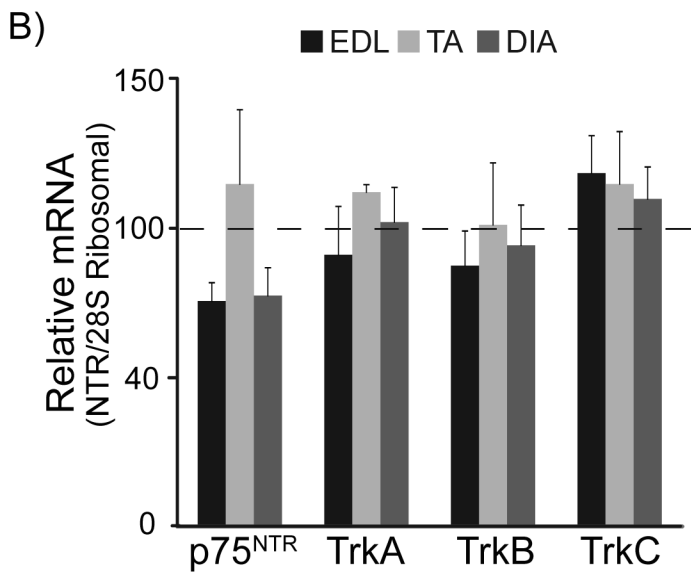

A)

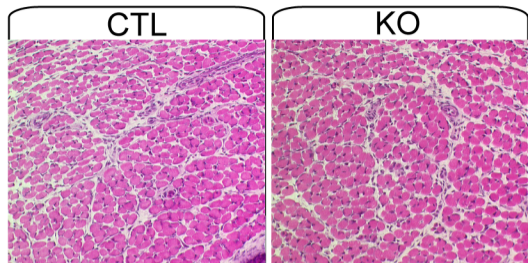

B)

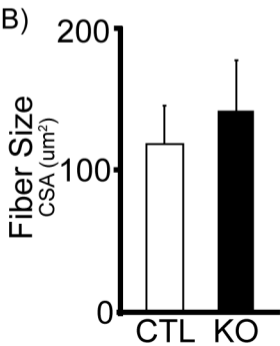

C)

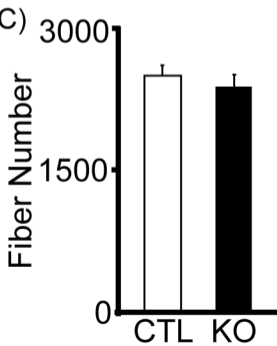

# Relative mRNA

(MRF/28S Ribosomal)

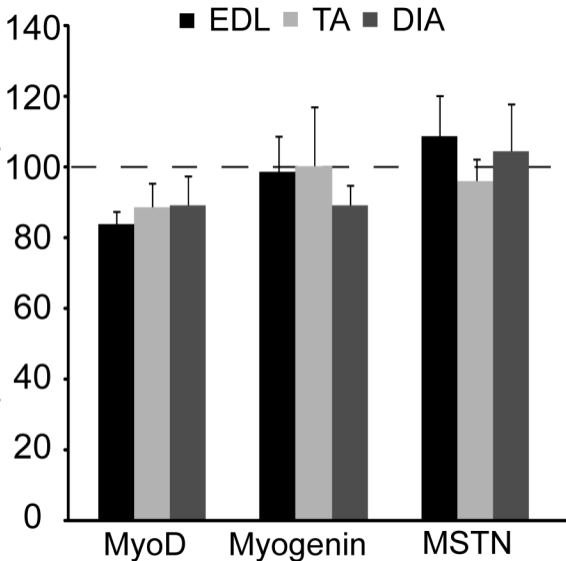

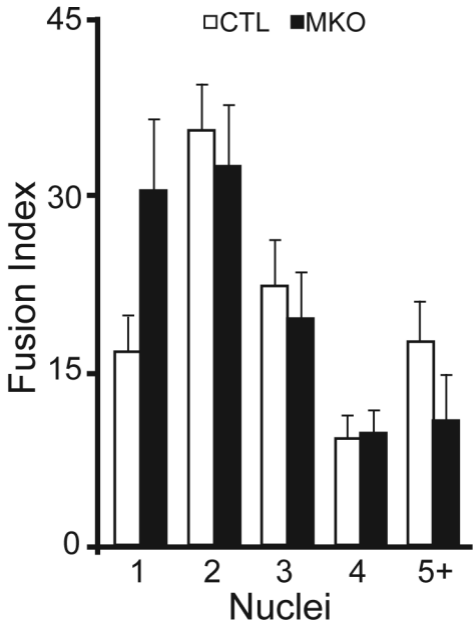

Supplement: E10-02-0154_1.pdf [file E10-02-0154_1.pdf]
